# Supplementary material for: WHO standards-based tools to measure service providers’ and service users’ views on the quality of hospital child care: development and validation in Italy
Source: HighWire-hosted journal article supplement (doi:10.1136/bmjopen-2021-052115), 2022-03-01
Supplement: bmjopen-2021-052115supp002_data_supplement.pdf [file bmjopen-2021-052115supp002_data_supplement.pdf]

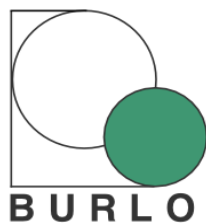

**INDAGINE SUGLI STANDARD OMS PER IL  
MIGLIORAMENTO DELLA QUALITÀ DELLE CURE  
PEDIATRICHE**

**Il punto di vista dei  
pazienti**

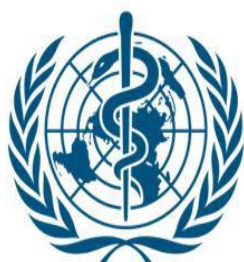

**WHO Collaborating Center  
for Maternal and Child Health  
Trieste Italy**

**Perché quest'indagine?**

Il presente questionario (*"Il punto di vista dei pazienti"*) è distribuito ai genitori che accedono presso la struttura col proprio bambino, in parallelo ad un secondo questionario distribuito agli operatori sanitari, nell'ambito di un progetto multicentrico ed internazionale coinvolgente altri ospedali in Italia e in Brasile. I questionari raccolgono informazioni principalmente su degli standard proposti dall'Organizzazione Mondiale della Sanità (OMS) per migliorare la qualità delle cure pediatriche in ospedale.

**Perché partecipare?**

Le informazioni raccolte saranno utilizzate per capire meglio il punto di vista degli operatori sanitari e dell'utenza e per raccogliere eventuali proposte su come migliorare la qualità delle cure erogate. La incoraggiamo fortemente a partecipare, e a scrivere quello che pensa, perché questa è un'occasione importante per fare la differenza.

**Questo questionario permette di dar voce alle sue idee!**

**Il questionario è anonimo?**

In questo questionario non chiediamo il suo nome né altre informazioni che possano svelare la sua identità. Quindi si senta libero di rispondere quello che pensa veramente.

**Per noi è importante la sua vera opinione.**

**Chi può compilare il questionario?**

Il questionario può essere compilato da madre, padre, tutore/altro familiare, da soli o insieme. Dal momento che il principale interessato delle cure è il suo/a bambino/a cercate di compilare insieme a lui/lei il questionario, se il/la bambino/a è in grado di partecipare.

**Come consegnare il questionario?**

Questo questionario esiste in versione cartacea od online. Se Lei ha compilato il questionario cartaceo, dopo averlo compilato (tempo stimato circa **15 minuti**), lo può consegnare a uno degli operatori sanitari che ha seguito il suo bambino. La versione online confluisce direttamente in un database anonimo.

**Grazie per il tempo che ci dedica,  
Le auguriamo una buona giornata!**

**A) Il suo bambino è stato ricoverato presso l'ospedale di:**

- Alessandria
- Bari
- Catania
- Firenze
- Latina
- Mantova
- Padova
- Palermo
- Ravenna
- Treviso
- Trieste
- Udine

**B) Il sesso del suo bambino è:**

- Maschio
- Femmina

**C) Il bambino/a ha:**

- meno di 6 mesi
- tra 6 mesi e 3 anni
- tra 3 e 6 anni
- tra 6 e 12 anni
- tra 12 e 16 anni

**D) Il bambino/a è stato condotto/a in ospedale per:**

- febbre
- diarrea
- malattia respiratoria
- altro, specificare \_\_\_\_\_

**E) Il bambino/a è stato ricoverato/a in:**

- Pronto Soccorso
- Clinica Pediatrica

**F) Il bambino/a è stato ospedalizzato per:**

- meno di 1 giorno
- 1-2 giorni
- 3-7 giorni
- Oltre 7 giorni

- Oltre 15 giorni
- Oltre 1 mese

**G) Questo questionario è stato compilato da:**

- Solo la madre
- Solo il padre
- Solo altro familiare/tutore
- Più di un familiare contemporaneamente

**H) Il bambino ha partecipato a rispondere a questo questionario:**

- Sì
- No

**SEZIONE A. RISORSE FISICHE PER BAMBINI E GENITORI**Ritiene che le seguenti **strutture fisiche e servizi siano appropriate?**

|                                                                                                                                                             | Si | No, necessita qualche miglioramento | No, necessita un miglioramento drastico |
|-------------------------------------------------------------------------------------------------------------------------------------------------------------|----|-------------------------------------|-----------------------------------------|
| <b>REPARTO E STANZE</b>                                                                                                                                     |    |                                     |                                         |
| 1. Aree dedicate ai bambini decorate e accoglienti                                                                                                          |    |                                     |                                         |
| 2. Comfort ed equipaggiamento generale delle stanze (incluso postazioni per il cambio del pannolino)                                                        |    |                                     |                                         |
| 3. Numero di persone per stanza                                                                                                                             |    |                                     |                                         |
| 4. Acustica nelle stanze                                                                                                                                    |    |                                     |                                         |
| 5. Illuminazione (e/o uso della stessa) nelle stanze                                                                                                        |    |                                     |                                         |
| 6. Pulizia delle stanze                                                                                                                                     |    |                                     |                                         |
| 7. Letto adeguato per il genitore                                                                                                                           |    |                                     |                                         |
| 8. Letto adeguato per il bambino                                                                                                                            |    |                                     |                                         |
| <b>SERVIZI IGIENICI</b>                                                                                                                                     |    |                                     |                                         |
| 9. Quantità dei servizi igienici                                                                                                                            |    |                                     |                                         |
| 10. Pulizia dei servizi igienici                                                                                                                            |    |                                     |                                         |
| 11. Localizzazione dei servizi igienici                                                                                                                     |    |                                     |                                         |
| 12. Servizi igienici adatti alle esigenze ed alle cure dei bambini (es: postazione per cambiare il pannolino ben attrezzata, bacinelle per bagnetto)        |    |                                     |                                         |
| <b>MENSA</b>                                                                                                                                                |    |                                     |                                         |
| 13. Qualità dei pasti (cibo e acqua in quantità sufficiente; cibi igienici, gustosi, con una varietà sufficiente per soddisfare le esigenze dei bambini)    |    |                                     |                                         |
| 14. Costo della mensa (per i genitori e bambini)                                                                                                            |    |                                     |                                         |
| 15. Aree in cui poter preparare da soli pasti/merende speciali per il/la bambino/a                                                                          |    |                                     |                                         |
| <b>SPAZI GIOCO ED ALTRI SPAZI</b>                                                                                                                           |    |                                     |                                         |
| 16. Spazi gioco puliti ed arredati in maniera appropriata e disponibilità di giocattoli, giochi, libri e attrezzature per i bambini adeguati alle varie età |    |                                     |                                         |
| 17. Spazi di sale d'attesa adeguati al confort bambini e famiglie ed a proteggere la privacy                                                                |    |                                     |                                         |
| 18. Spazi per il colloquio con i medici in privato                                                                                                          |    |                                     |                                         |
| 19. Spazi in cui poter incontrare familiari e amici durante l'ospedalizzazione                                                                              |    |                                     |                                         |

Nella struttura in cui il bambino/a è stato ospedalizzato, rispetto **al personale**:

|                                                                                  | Si | No, necessita qualche miglioramento | No, necessita un miglioramento drastico |
|----------------------------------------------------------------------------------|----|-------------------------------------|-----------------------------------------|
| 20. Il personale medico è presente in numero adeguato                            |    |                                     |                                         |
| 21. Il personale infermieristico e altro personale è presente in numero adeguato |    |                                     |                                         |
| 22. Tutto il personale è sufficientemente qualificato a svolgere le sue mansioni |    |                                     |                                         |
| 23. Tutto il personale è sufficientemente motivato                               |    |                                     |                                         |

Nella struttura in cui il bambino/a è stato ospedalizzato, rispetto **all'equipaggiamento**:

|                                                                                                                           | Si | No, necessita qualche miglioramento | No, necessita un miglioramento drastico |
|---------------------------------------------------------------------------------------------------------------------------|----|-------------------------------------|-----------------------------------------|
| 24. Tutte le procedure diagnostiche (laboratorio e strumentali) necessarie per le indagini sul bambino/a sono disponibili |    |                                     |                                         |
| 25. Tutti i farmaci necessari per la cura del bambino/a sono disponibili                                                  |    |                                     |                                         |

**Quali sono i Suoi suggerimenti per migliorare gli aspetti di cui sopra? (Aggiungere nel box)**

**SEZIONE B. ESPERIENZA DELLE CURE E TUTELA DEI DIRITTI DEI PAZIENTI**

1. Sa cosa è la **Carta dei Diritti del bambino**?

- Sì
- No

2. La **Carta dei Diritti del Bambino** è esposta all'interno della struttura ospedaliera in cui Lei si trova?

- Sì
- No o non lo so (non l'ho mai vista)

3. E' stato adeguatamente informato sui diritti di cura del/della bambino/a?

- Sì
- No

4. Ha visto poster/brochures relativi al latte di formula (**allattamento artificiale**) esposti all'interno della struttura ospedaliera?

- Sì
- No

Rispetto alla sua **esperienza di ricovero**:

|                                                                                                                                                                                                                                                                 | Sì | No, necessita qualche miglioramento | No, necessita un miglioramento drastico |
|-----------------------------------------------------------------------------------------------------------------------------------------------------------------------------------------------------------------------------------------------------------------|----|-------------------------------------|-----------------------------------------|
| <b>ACCESSIBILITA'</b>                                                                                                                                                                                                                                           |    |                                     |                                         |
| 5. I punti di accesso ai servizi di emergenza (incluso Pronto Soccorso) Le sono apparsi immediatamente riconoscibili                                                                                                                                            |    |                                     |                                         |
| 6. Non ha incontrato barriere fisiche all'accesso a servizi e strutture                                                                                                                                                                                         |    |                                     |                                         |
| 7. I servizi dedicati al bambino/a sono separati da quelli per gli adulti, garantiscono continuità di accesso e sono strutturati in maniera child-friendly (= adatti alle esigenze di un bambino)                                                               |    |                                     |                                         |
| 8. Siete stati esentati dal pagamento per delle cure ricevute                                                                                                                                                                                                   |    |                                     |                                         |
| <b>CURE IN TEMPO DEBITO</b>                                                                                                                                                                                                                                     |    |                                     |                                         |
| 9. Il tempo di attesa per la prima valutazione in triage Le è sembrato accettabile                                                                                                                                                                              |    |                                     |                                         |
| 10. Il tempo di attesa in generale per le altre prestazioni Le è sembrato accettabile                                                                                                                                                                           |    |                                     |                                         |
| <b>CONTROLLO DEL DOLORE</b>                                                                                                                                                                                                                                     |    |                                     |                                         |
| 11. Alla prima visita e durante la degenza, incluso durante procedure invasive, il dolore del bambino/a è stato adeguatamente valutato (per esempio con una scala del dolore: faccine, punteggio da 0 a 10) e, se necessario, prevenuto e prontamente trattato? |    |                                     |                                         |
| <b>IGIENE</b>                                                                                                                                                                                                                                                   |    |                                     |                                         |

|                                                                                                                                                                                                      | Si | No, necessita qualche miglioramento | No, necessita un miglioramento drastico |
|------------------------------------------------------------------------------------------------------------------------------------------------------------------------------------------------------|----|-------------------------------------|-----------------------------------------|
| 12. Prima di ogni visita/procedura, i medici/infermieri si sono lavati le mani/hanno usato detergente gel (se non li ha visti farlo metta No)                                                        |    |                                     |                                         |
| 13. Prima di ogni procedura invasiva (es. prelievo) sono utilizzate adeguatamente le soluzioni disinfettati e le procedure di asepsi                                                                 |    |                                     |                                         |
| <b>COMUNICAZIONE E QUALITA' DELL'INTERAZIONE</b>                                                                                                                                                     |    |                                     |                                         |
| 14. Gli operatori sanitari (medici, infermieri) si sono presentati con nome e ruolo od indossavano un cartellino identificativo                                                                      |    |                                     |                                         |
| 15. Gli operatori sanitari hanno instaurato con Lei una comunicazione efficace (es. parlavano chiaramente, ascoltavano attivamente)                                                                  |    |                                     |                                         |
| 16. Gli operatori sanitari hanno interagito nelle forme più opportune con il bambino/a (per esempio usando modalità comunicative adatte alla sua età)                                                |    |                                     |                                         |
| <b>INFORMAZIONE E PARTECIPAZIONE ALLE CURE</b>                                                                                                                                                       |    |                                     |                                         |
| 17. Ha ricevuto in modo tempestivo le informazioni riguardanti le condizioni del bambino/a                                                                                                           |    |                                     |                                         |
| 18. E' stato informato in maniera sufficiente ed esaustiva sulle possibilità diagnostiche e terapeutiche per il/la bambino/a                                                                         |    |                                     |                                         |
| 19. Ha sentito/a di poter esprimere il suo parere rispetto a quali scelte di trattamento erano migliori per il bambino/a                                                                             |    |                                     |                                         |
| 20. Le è stato spiegato come poter partecipare attivamente alle cure del bambino/a (es. come monitorare l'andamento delle condizioni del bimbo, come accudirlo, come somministrare farmaci ed altro) |    |                                     |                                         |
| <b>CONSENSO INFORMATO</b>                                                                                                                                                                            |    |                                     |                                         |
| 21. Ha ricevuto un foglio di consenso informato da sottoscrivere per ogni procedura, analisi o trattamento                                                                                           |    |                                     |                                         |
| 22. Il foglio di consenso informato che le è stato chiesto di firmare era chiaro, informativo ed esaustivo                                                                                           |    |                                     |                                         |
| 23. Gli operatori sanitari hanno sempre fornito tutte le informazioni necessarie ed hanno risposto alle sue eventuali richieste di chiarimenti                                                       |    |                                     |                                         |
| <b>CONTINUITA' DELLE CURE</b>                                                                                                                                                                        |    |                                     |                                         |
| 24. Al cambio turno il passaggio di informazioni tra gli operatori è sempre stato efficace nello stesso reparto                                                                                      |    |                                     |                                         |
| 25. Lo scambio di informazioni tra operatori è stato sempre efficace anche tra reparti/servizi diversi                                                                                               |    |                                     |                                         |
| 26. Non ha mai avuto informazioni/pareri discordanti da diversi operatori                                                                                                                            |    |                                     |                                         |
| 27. Non ha mai assistito ad episodi di aggressività tra operatori sanitari (es. aggressività verbale, bullismo tra di loro od altro)                                                                 |    |                                     |                                         |
| <b>PROMOZIONE DELLA SALUTE</b>                                                                                                                                                                       |    |                                     |                                         |
| 28. Le è stato consegnato materiale informativo sulla salute, adatto alle condizioni ed all'età del bambino/a od, in                                                                                 |    |                                     |                                         |



|                                                                                                                                                                                          | Si | No, necessita qualche miglioramento | No, necessita un miglioramento drastico |
|------------------------------------------------------------------------------------------------------------------------------------------------------------------------------------------|----|-------------------------------------|-----------------------------------------|
| alternativa, sono state date spiegazioni adeguate per via orale                                                                                                                          |    |                                     |                                         |
| <b>PRIVACY</b>                                                                                                                                                                           |    |                                     |                                         |
| 29. E' stata sempre garantita la vostra privacy (es. la visita è stata condotta in un luogo dove nessun altro poteva sentire o vedere)                                                   |    |                                     |                                         |
| 30. Ha avuto l'impressione che i suoi dati personali fossero sempre protetti, tutelando la vostra privacy                                                                                |    |                                     |                                         |
| <b>DIRITTO ALLA PRESENZA DEL GENITORE</b>                                                                                                                                                |    |                                     |                                         |
| 31. Hanno permesso che il bambino/a avesse accanto, per tutto il tempo, suoi genitori /tutori (anche durante le procedure mediche)?                                                      |    |                                     |                                         |
| 32. Ai genitori sono state offerte adeguate strutture per stare accanto al bambino/a (es. letto per dormire accanto al bambino/a, servizi igienici adeguati, mensa adeguata)             |    |                                     |                                         |
| <b>EDUCAZIONE E GIOCO</b>                                                                                                                                                                |    |                                     |                                         |
| 33. L'ospedale offre degli spazi gioco e delle opportunità per rispettare il bisogno di gioco dei bambini                                                                                |    |                                     |                                         |
| <b>SUPPORTO EMOTIVO e PSICOLOGICO</b>                                                                                                                                                    |    |                                     |                                         |
| 34. Lei e il bambino/a siete stati adeguatamente supportati emotivamente durante l'ospedalizzazione dallo staff e, se necessario, anche da staff specializzato (es. psicologo)           |    |                                     |                                         |
| <b>RISPETTO E DIGNITA'</b>                                                                                                                                                               |    |                                     |                                         |
| 35. Lei e il bambino/a siete sempre stati trattati con rispetto per la vostra dignità                                                                                                    |    |                                     |                                         |
| 36. I vostri bisogni e preoccupazioni non sono state mai minimizzate                                                                                                                     |    |                                     |                                         |
| 37. Gli operatori non vi hanno mai fatto sentire in colpa per qualcosa che è successo a lei e/o al bambino/a durante la permanenza in ospedale né siete stati rimproverati ingiustamente |    |                                     |                                         |
| 38. Non siete mai stati trascurati dal personale ospedaliero                                                                                                                             |    |                                     |                                         |
| 39. Gli operatori sanitari non hanno mai fatto commenti negativi sulla sua cultura, etnia, religione                                                                                     |    |                                     |                                         |
| 40. Le è stato spiegato come poter esprimere lamentele o suggerimenti                                                                                                                    |    |                                     |                                         |

**Quali sono i Suoi suggerimenti per aumentare la soddisfazione degli utenti rispetto alla qualità delle cure ricevute? (Aggiungere nel box)**

**SEZIONE C. EMERGENZA COVID-19**

1. La paura di contrarre in ospedale l'infezione da COVID-19 ha ritardato la decisione di condurre il/la suo/a bambino/a in ospedale?
  - Sì, in maniera determinante
  - Sì, in parte
  - No
  
2. Prima dell'accesso in ospedale ha avuto modo di contattare il suo pediatra di famiglia?
  - Sì, ed il pediatra ha visitato il bambino
  - Sì, ma solo telefonicamente, l'ambulatorio non era aperto o il pediatra mi ha consigliato di venire in ospedale
  - No, non era raggiungibile neanche telefonicamente
  - Non ho provato a contattarlo

| <b>In ospedale</b>                                                                                                                                                                                                                    | <b>Sì</b> | <b>No, necessita qualche miglioramento</b> | <b>No, necessita un miglioramento drastico</b> |
|---------------------------------------------------------------------------------------------------------------------------------------------------------------------------------------------------------------------------------------|-----------|--------------------------------------------|------------------------------------------------|
| 1. All'ingresso in ospedale e nei reparti e' presente una adeguata infografica (cartelli, poster, etc) indicante in maniera efficace il percorso da seguire o le norme da rispettare in riferimento all'attuale pandemia da COVID-19? |           |                                            |                                                |
| 2. La divisione tra reparti e gli spazi comuni sono stati adeguatamente riorganizzati per ridurre per quanto possibile il rischio di infezione da COVID-19?                                                                           |           |                                            |                                                |
| 3. Le stanze di degenza sono state adeguatamente riorganizzate per ridurre per quanto possibile il rischio di infezione da COVID-19?                                                                                                  |           |                                            |                                                |
| 4. Il personale sanitario era sempre dotato di adeguati dispositivi di protezione individuale (mascherine, guanti) al momento della visita e le usava in maniera corretta?                                                            |           |                                            |                                                |
| 5. Ha avuto sempre facile accesso a postazioni per lavaggio mani o soluzioni disinfettati adeguate?                                                                                                                                   |           |                                            |                                                |
| 6. Il personale sanitario era sempre presente in numero sufficiente per la cura del Suo bambino nonostante l'attuale emergenza da COVID-19?                                                                                           |           |                                            |                                                |
| 7. Ritiene di aver avuto accesso a tutte le cure necessarie, nonostante l'emergenza COVID-19?                                                                                                                                         |           |                                            |                                                |
| 8. Le informazioni ricevute rispetto ad aspetti strettamente inerenti al COVID le sono sembrate chiare ed esaustive?                                                                                                                  |           |                                            |                                                |
| 9. Ritiene che il personale sia stato in grado di usare modalità di iterazione adeguate, per ridurre per quanto possibile lo stress legato alle nuove procedure da COVID-19 nel suo bambino?                                          |           |                                            |                                                |

10. Al momento attuale quanto è preoccupato che il suo bambino o Lei od altri accompagnatori possano contrarre l'infezione in ospedale?
  - Poco
  - Abbastanza
  - molto

**Quali sono i Suoi suggerimenti per migliorare la qualità delle cure in questa fase di emergenza COVID-19? (Aggiungere nel box)**

**Che suggerimenti ci dà per migliorare questa parte del questionario?**

#### SEZIONE D. SODDISFAZIONE GENERALE

**1. In generale, che punteggio dà alla qualità delle cure ricevuta in ospedale? ( 0= qualità molto bassa, 10 =eccellente) : 0 1 2 3 4 5 6 7 8 9 10**

**2. Tornerebbe in questo Ospedale o consiglierebbe questa struttura ad un amico?**

- Si
- No

#### INFORMAZIONI DEMOGRAFICHE

**3. Quanti anni ha? \_\_\_\_\_**

**4. Qual è il suo sesso:**

- Maschio
- Femmina
- Altro

**5. Qual è il suo stato occupazionale?**

- Disoccupato/a, in cerca di occupazione
- Lavoratore part-time
- Lavoratore full-time

**6. Il suo grado d'istruzione è?**

- Nessuno
- Elementari /media inferiore
- Scuola superiore
- Laurea
- Post Laurea

**7. Quanti figli ha?**

- Nessuno
- 1 figlio
- 2 figli
- 3 figli

- Oltre 3 figli

**8. Dove è nato il bambino/a attualmente ricoverato?**

- Italia
- Altri paesi, quale \_\_\_\_\_

**9. I genitori del bambino sono**

- Entrambi i genitori sono italiani
- Uno italiano, uno straniero
- Entrambi i genitori sono stranieri

**IN MERITO AL QUESTIONARIO...**

Ritiene che questo questionario possa essere utile a catturare gli aspetti importanti per l'utenza?

- Sì
- No

Ritiene che il questionario sia esaustivo?

- Sì
- No

Quali aspetti sono più importanti per lei ed il suo bambino?

- Tutto
- Sezione A
- Sezione B
- Solo alcuni item di ogni sezione

Rispetto alla lunghezza del questionario:

- E' adeguata
- E' troppo lungo
- E' troppo corto

Che modifiche suggerisce

**Grazie ancora per averci donato il suo tempo prezioso!**
